1 **Title: Fungal effector SIB1 of *Colletotrichum orbiculare* has unique structural**  
2 **features and can suppress plant immunity in *Nicotiana benthamiana***

3  
4 Ru Zhang<sup>a\*</sup>, Noriyoshi Isozumi<sup>b\*</sup>, Masashi Mori<sup>c</sup>, Ryuta Okuta<sup>a</sup>, Suthitar Singkaravanit-  
5 Ogawa<sup>a</sup>, Tomohiro Imamura<sup>c</sup>, Pamela Gan<sup>d</sup>, Ken Shirasu<sup>d</sup>, Shinya Ohki<sup>b</sup> and Yoshitaka  
6 Takano<sup>a</sup>

7  
8 <sup>a</sup> Graduate School of Agriculture, Kyoto University, Kyoto 606-8501, Japan.

9 <sup>b</sup> Center for Nano Materials and Technology (CNMT), Japan Advanced Institute of  
10 Science and Technology (JAIST), Ishikawa 923-1292, Japan.

11 <sup>c</sup> Research Institute for Bioresources and Biotechnology, Ishikawa Prefectural University,  
12 Ishikawa 921-8836, Japan.

13 <sup>d</sup> Center for Sustainable Resource Science, RIKEN, Yokohama 230-0045, Japan

14 \* These two authors equally contributed to this work.

15  
16 Corresponding authors: Yoshitaka Takano ([takano.yoshitaka.2x@kyoto-u.ac.jp](mailto:takano.yoshitaka.2x@kyoto-u.ac.jp)), Shinya  
17 Ohki, and Masashi Mori

18  
19 **Running title**

20 Effector with unique structure suppresses plant immunity

21  
22 **Keywords**

23 Effector; Plant immunity; *Colletotrichum orbiculare*; Susceptibility; Three-dimensional  
24 structure

25  
26

27 **Abstract**

28 Functional screening of effector candidates using a transient expression assay in  
29 *Nicotiana benthamiana* identified two virulence-related effectors, named SIB1 and SIB2  
30 (Suppression of Immunity in *N. benthamiana*), of an anthracnose fungus *Colletotrichum*  
31 *orbiculare*, which infects both cucurbits and *N. benthamiana*. *Agrobacterium*-mediated  
32 transient expression of SIB1 or SIB2 increased the susceptibility of *N. benthamiana* to *C.*  
33 *orbiculare*, which suggested these effectors can suppress immune responses in *N.*  
34 *benthamiana*. The presence of SIB1 and SIB2 homologs was found to be limited to the  
35 genus *Colletotrichum*. SIB1 suppressed both the generation of reactive oxygen species  
36 (ROS) triggered by the bacterial pathogen-associated molecular pattern (PAMP), flg22,  
37 and the cell death response triggered by the *Phytophthora infestans* INF1 elicitor in *N.*  
38 *benthamiana*. We determined the NMR-based structure of SIB1 to obtain its structural  
39 insights. The three-dimensional structure of SIB1 comprises five  $\beta$ -strands, each  
40 containing three disulfide bonds. The overall conformation was found to be a cylindrical  
41 shape, such as the well-known antiparallel  $\beta$ -barrel structure. However, the  $\beta$ -strands  
42 were found to display a unique topology, one pair of these  $\beta$ -strands formed a parallel  $\beta$ -  
43 sheet. These results suggest that the effector SIB1 present in *Colletotrichum* fungi has  
44 unique structural features and can suppress PAMP-triggered immunity (PTI) in *N.*  
45 *benthamiana*.

46

## 47 **Introduction**

48 Plants use multilayered strategies to detect and defeat pathogenic microbes trying to  
49 attack them (1,2). As the first layer of plant defense, plants recognize conserved  
50 components of microbes called PAMPs, which are often present on their external face.  
51 Plant recognition of PAMPs triggers PTI. Although the plant immune system against  
52 most potential pathogenic microbes, especially nonadapted pathogens, is thought to  
53 depend mainly on PTI, adapted pathogens have evolved various mechanisms to suppress  
54 PTI (3). The secreted virulence factors, called effectors, play important roles in the  
55 suppression of PTI. In response to a pathogen's use of effectors to try to suppress PTI,  
56 plants actuate their second layer of defense, called effector-triggered immunity (ETI) (4).  
57 ETI induces strong and robust immune responses that are typically associated with  
58 programmed cell death (PCD), a response referred to as the hypersensitive response (HR).

59

60 Members of the ascomycete genus *Colletotrichum* include numerous species that can  
61 infect a wide range of plant species, including many commercially important cultivars (5-  
62 7). The lifestyle of *Colletotrichum* species is considered to be hemibiotrophic, which  
63 combines an initial short biotrophic phase to maintain live host tissue and a subsequent  
64 necrotrophic phase that kills host tissue. In general, *Colletotrichum* fungi develop a  
65 specialized infection structure called appressorium that is darkly pigmented with melanin,  
66 and melanized appressorium is important for host penetration (8,9). Genome analyses  
67 have identified numerous effector candidate genes in *Colletotrichum* fungi such as *C.*  
68 *higginsianum* and *C. orbiculare* (5,6).

69

70 *C. orbiculare* belongs to the orbiculare clade and infects multiple cucurbitaceous cultivars  
71 (9-11). Interestingly, *C. orbiculare* can also infect *Nicotiana benthamiana*, which belongs  
72 to the Solanaceae family but is distant from cucurbits (12-14). We previously reported on  
73 the virulence-related effectors NIS1 and CoDN3 of *C. orbiculare* that are preferentially  
74 expressed in the biotrophic phase (15,16). We reported that the expression of NIS1 leads  
75 to PCD in *N. benthamiana*, and that the NIS1-triggered PCD is suppressed by CoDN3  
76 expression (16). CoDN3 also inhibits PCD in *N. benthamiana* induced by another *C.*  
77 *orbiculare* effector NLP1 (17). We recently reported on the NIS1 targets *Arabidopsis*

78 *thaliana* BAK1 and BIK1, which function in PAMP recognition and subsequent PTI  
79 activation, together with pattern recognition receptors that sense particular PAMPs (18).

80

81 We have previously reported that both adapted and nonadapted *Colletotrichum* fungi  
82 commonly develop melanized appressoria on *Arabidopsis* at 1 day post inoculation (1 dpi)  
83 (19). However, melanized appressoria of the adapted *Colletotrichum* fungus develop  
84 invasive hyphae successfully, whereas those of nonadapted *Colletotrichum* fungi fail to  
85 develop invasive hyphae because *Arabidopsis* plants activate a preinvasive defense (19).  
86 The finding therefore suggested that melanized appressoria of *Colletotrichum* fungi likely  
87 secrete effectors that are critical for the suppression of preinvasive plant defense.  
88 Consistently, microarray-based expression analysis of *C. orbiculare* inoculated on *N.*  
89 *benthamiana* shows that many small, secreted protein genes are highly expressed at 1 dpi,  
90 when the pathogen has developed melanized appressoria but has not yet formed invasive  
91 hyphae (5).

92

93 In this study, to identify novel virulence-related effectors of *C. orbiculare*, we focused on  
94 the effector-like genes expressed at 1 dpi after inoculation of *C. orbiculare* on *N.*  
95 *benthamiana*. Using the newly obtained RNA sequence data derived from *N.*  
96 *benthamiana* inoculated with *C. orbiculare* at 1 dpi, we selected candidate effector-like  
97 genes of *C. orbiculare* and subjected them to a functional screening assay to assess  
98 *Agrobacterium*-mediated transient expression. Each candidate was transiently expressed  
99 in *N. benthamiana* leaves that were subsequently challenged with *C. orbiculare* to assess  
100 each candidate's ability to suppress the immunity of *N. benthamiana*. In these  
101 experiments, we identified two novel virulence-related effectors, named SIB1 and SIB2  
102 (Suppression of Immunity in *N. benthamiana*), that suppressed *N. benthamiana* immunity  
103 against *C. orbiculare*. We then performed further characterization of SIB1. Transient  
104 expression of SIB1 suppressed both the generation of reactive oxygen species (ROS)  
105 triggered by a bacterial PAMP, flg22, and the cell death response triggered by the  
106 *Phytophthora infestans* INF1 elicitor. We next determined the tertiary structure of SIB1  
107 to obtain structural insights into this effector. Using NMR analysis, we have solved the  
108 tertiary structure of SIB1, which showed that the effector SIB1 of *C. orbiculare* has  
109 unique structural features.

110

111

## 112 **Results**

113

### 114 **Functional screening of virulence-related effectors in *C. orbiculare***

115 We obtained RNA sequence data from the following: (i) *N. benthamiana* leaves  
116 inoculated with *C. orbiculare* at 1, 3, and 7 dpi; (ii) conidia of *C. orbiculare*, and (iii) *in*  
117 *vitro* grown hyphae of *C. orbiculare*. We ranked the putative secreted protein genes of *C.*  
118 *orbiculare* based on their expression in *N. benthamiana* at 1 dpi (Table S1). The list  
119 included *NIS1* and *CAD1*, which we have previously studied (18,20). We then selected  
120 eight candidates, named CE1 to CE8 (Table S1), from the list, and these selected  
121 candidates were subjected to further functional screening. As mentioned above, *C.*  
122 *orbiculare* infects and causes lesions in *N. benthamiana* (13,14). In a study using a  
123 functional assay based on the *Agrobacterium*-mediated transient expression of *NIS1* in *N.*  
124 *benthamiana* and subsequent inoculation with *C. orbiculare*, we recently reported that  
125 the expression of the effector *NIS1* in *N. benthamiana* increased its susceptibility to *C.*  
126 *orbiculare* (18). We applied this assay to the functional screening of the selected  
127 candidates.

128

129 We expressed each candidate in *N. benthamiana* by transient expression using  
130 *Agrobacterium* infiltration, and we challenged the expression sites of each candidate by  
131 inoculation with *C. orbiculare*. The expression of CE6 caused lesion development before  
132 *C. orbiculare* inoculation, suggesting that CE6 can induce cell death in *N. benthamiana*  
133 (Fig. S1). The other candidates did not cause lesion development before *C. orbiculare*  
134 inoculation. Notably, we found that the expression of two candidates (CE7 and CE5) in  
135 *N. benthamiana* increased its susceptibility to *C. orbiculare* (Fig. 1A and 1B). Expression  
136 of the other candidates had no obvious effect on the susceptibility to *C. orbiculare*. These  
137 results suggest that CE7 and CE5 can suppress plant immunity of *N. benthamiana* against  
138 *C. orbiculare*.

139

140 We named CE7 and CE5 as *SIB1* and *SIB2* (Suppression of Immunity in *N. benthamiana*),  
141 respectively. *SIB1* (GenBank accession number, TDZ19150.1) encodes a protein of 70

142 amino acids that had no significant matches in a Pfam search. SignalP analysis has  
143 suggested that SIB1 has a signal peptide of 20 amino acids (21) (Fig. 1C). *SIB2* (GenBank  
144 accession number, TDZ19243.1) encodes a protein of 99 amino acids that includes a  
145 signal peptide of 18 amino acids but has no clear domains as shown in a Pfam search. We  
146 then performed BlastP against the NCBI non-redundant protein database using SIB1 and  
147 SIB2 as the query sequences (Fig. S2). We found homologs of *SIB1* (100% identity in  
148 amino acid sequence) in *C. spinosum*, *C. trifolii*, and *C. sidae* that are members of the  
149 orbiculare clade that *C. orbiculare* belongs to. In contrast, genes predicted to encode full-  
150 length SIB2 homologs were only identified in *C. spinosum* and *C. trifolii*, but not in *C.*  
151 *sidae*. Homologs of both *SIB1* and *SIB2* were also found in a subset of *Colletotrichum*  
152 species outside the orbiculare clade but were not found outside the *Colletotrichum* genus  
153 (Fig. S2).

154

#### 155 **Suppression by SIB1 of multiple PTI responses in *N. benthamiana***

156 We decided to focus on SIB1 and performed further characterization of this novel effector.  
157 We will report further studies on CE6 and SIB2 elsewhere. To investigate whether SIB1  
158 suppresses PAMP-triggered ROS generation in *N. benthamiana*, we measured the ROS  
159 generation triggered by a bacterial PAMP flg22 in *N. benthamiana* expressing SIB1. It  
160 was recently reported that the NIS1 of *C. orbiculare* and an NIS1 homolog of  
161 *Magnaporthe oryzae* (MoNIS1) commonly suppress flg22-induced ROS production in *N.*  
162 *benthamiana* (18); therefore, we also investigated flg22-induced ROS production in the  
163 presence of MoNIS1. Both SIB1 and MoNIS1 suppressed flg22-induced ROS production  
164 compared with the negative control enhanced green fluorescent protein (eGFP) (Fig. 2A),  
165 which suggests that SIB1 can suppress one of the typical PTI responses. Some effectors  
166 have been shown to increase the virulence of a pathogen by suppressing the HR, which  
167 is accompanied by cell death (22).

168

169 *P. infestans* INF1 is a well-known oomycete PAMP elicitor that can induce the HR in *N.*  
170 *benthamiana* leaves (23). NIS1 and MoNIS1 also suppress INF1-induced HR cell death  
171 in *N. benthamiana* (18). To investigate whether SIB1 can interfere with cell death  
172 triggered by the PAMP elicitor, SIB1, MoNIS1 or eGFP was expressed in *N. benthamiana*  
173 using *Agrobacterium* infiltration, and the infiltration sites were challenged with

174 *Agrobacterium* carrying *INF1*. INF1-triggered lesion development was observed in the  
175 infiltration sites expressing GFP but was clearly suppressed in the sites expressing  
176 MoNIS1 as previously shown. Notably, SIB1 also suppressed INF1-induced lesion  
177 development, which indicated that SIB1 suppresses HR cell death triggered by the PAMP  
178 elicitor INF1 (Fig. 2B). These findings suggest that the effector SIB1 can suppress  
179 multiple PTI responses in *N. benthamiana*.

180

181 We next performed quantitative reverse transcription PCR (RT-qPCR) analysis to  
182 investigate the expression pattern of *SIB1* in conidia of *C. orbiculare* inoculated on *N.*  
183 *benthamiana* and cucumber. The expression of *SIB1* at 0, 24, and 72 hour post inoculation  
184 (hpi) with *C. orbiculare* on *N. benthamiana* was consistent with the RNA sequence data  
185 (conidia, 1 dpi in *Nb*, and 3 dpi in *Nb*) (Table S1). *SIB1* expression started to be induced  
186 at 8 hpi and its expression level was highest at 12 hpi (Fig. 3A). *SIB1* expression was  
187 induced after inoculation on cucumber (Fig. 3A). However, the expression pattern of *SIB1*  
188 on cucumber was not identical to that on *N. benthamiana* (Fig. 3A); for example, *SIB1*  
189 expression was highly induced at 72 hpi on cucumber, but not on *N. benthamiana*.

190

191 We next applied targeted gene disruption of *SIB1* and investigated whether *SIB1* is  
192 required for the virulence of *C. orbiculare*. To delete *SIB1* in *C. orbiculare*, we first  
193 generated the *lig4* $\Delta$  strain from *C. orbiculare* 104-T, in which an increased homologous  
194 recombination ratio is expected (24), and used the *lig4* $\Delta$  strain as the parental strain for  
195 the gene disruption of *SIB1* (details are included in Materials and Methods). The *SIB1*-  
196 knockout vector, named pCB1636SIB1, was constructed and introduced into the *lig4* $\Delta$   
197 strain, and knockout mutants of *SIB1* were obtained (Fig. S3A and 3B). The colony  
198 morphology and conidiogenesis of the generated *SIB1*-knockout mutants (*sib1* $\Delta$ ) on  
199 potato dextrose agar (PDA) medium were similar to those of the control parental strain  
200 (Fig. S3C). We then inoculated the *sib1* $\Delta$  strains on *N. benthamiana*, cucumber, and  
201 melon, and found that the *sib1* $\Delta$  strains developed the same lesions as the control strain  
202 for all plants tested (Fig. 3B).

203

204 **Posttranscriptional modification of SIB1**

205 We next focused on the structural aspects of the effector SIB1. We tried to produce SIB1  
206 protein in the suspension-cultured BY-2 system (25,26), in which the research target  
207 protein is expressed as a fused protein together with both tobamovirus (ToMV) and  
208 transcription factor (XVE) to increase the productivity. This system also uses optimized  
209 signal peptides for endoplasmic reticulum migration and secretion to fold the yielded  
210 protein. The system can produce proteins containing disulfide bonds in their native  
211 conformation (27-30). We used this system to prepare SIB1, whose amino acid sequence  
212 has six Cys residues that are expected to form intramolecular disulfide bonds.

213

214 We prepared semi-purified SIB1 protein. When all Cys residues are in reduced form, the  
215 theoretical mass of SIB1 is calculated as 5414.19  $m/z$ . We treated the purified SIB1 as for  
216 the reduced form and confirmed the mass. As shown in Fig. 4, the mass of the reduced  
217 SIB1 was slightly smaller than the theoretical value of 5396.388  $m/z$ , which suggests that  
218 the SIB1 expressed by the BY-2 system had some modification. A search of the Unimod  
219 database suggested that the difference ( $-17.802 m/z$ ) is derived from pyroglutamylation  
220 of the N-terminal residue, Gln1. To confirm the pyroglutamylation of SIB1, we used  
221 pyroglutamate aminopeptidase (PGAP) treatment of SIB1. Because only N-terminal  
222 pyroglutamic acid is cleaved by this treatment, we used this assay to determine whether  
223 the sample protein contained N-terminal pyroglutamic acid. For the PGAP-treated sample  
224 (lower panel of Fig. 4), only the peak (5267.895  $m/z$ ), which corresponds to the N-  
225 terminal glutamine-cleaved SIB1 ( $\Delta Q1$ -SIB1), was detected. The mass spectrometry (MS)  
226 results showed clearly that the N-terminal residue of SIB1 expressed in BY-2 cells was  
227 pyroglutamic acid. The Gln at the N-terminal end was easily modified to pyroglutamic  
228 acid (31,32).

229

230 The mass of pyroglutamylated SIB1 suggested that all Cys residues were in the oxidized  
231 form, as shown in Fig. 5A. Therefore, we used MS to analyze the disulfide bond pairs.  
232 Lys-C treatment under nonreducing conditions caused SIB1 digestion, but the disulfide  
233 bonds were maintained. As shown in Fig. 5B, we observed four peaks for the Lys-C-  
234 treated sample: one peak (5031.432  $m/z$ ) corresponding to undigested SIB1 and three  
235 other peaks (1014.473  $m/z$ , 1949.780  $m/z$ , and 2077.858  $m/z$ ) indicating digested peptides  
236 containing disulfide linkages. Further MS analysis of the products of the enzymatic



237 digestion clearly indicated the existence of two disulfide bonds, Cys22–Cys27 and  
238 Cys35–Cys48, as shown in Fig. 5B. Peptides containing Cys5 and Cys11 were not  
239 detected, probably because of difficulty with their ionization. Because all Cys residues  
240 were in the oxidized form, as shown in Fig. 5B, the remaining two Cys residues, Cys5  
241 and Cys11, were expected to form disulfide bonds.

242

### 243 **Structure of SIB1**

244 Unlabeled and <sup>15</sup>N-labeled SIB1 samples were expressed in the BY-2 system, and the N-  
245 terminus of NMR sample used in this study was pyroglutamylated. As shown in Fig. S4,  
246 the <sup>1</sup>H-<sup>15</sup>N heteronuclear single quantum coherence (HSQC) spectrum of SIB1 showed  
247 well-dispersed signals with sharp line shapes, which indicated that SIB1 was in a stable  
248 conformation in solution. After the resonance assignments, three-dimensional structure  
249 calculation was performed using a standard CYANA protocol with the distance and angle  
250 constraints derived from NMR data. Disulfide bond constraints for three Cys–Cys pairs  
251 were also used in the calculation. We obtained the final 20 structures of SIB1 with 0.71  
252 ± 0.07Å of root mean square deviation for all heavy atoms of residues 2 to 49. The  
253 structural statistics are summarized in Table 1. Although only 48% (24/50) of the residues  
254 formed secondary structure, no dihedral angle fell into the disallowed region in the  
255 Ramachandran plot. The final 20 structures showed no violation in distance or angle  
256 restraints.

257

258 A backbone wire model of the final ensemble and a ribbon model of the representative  
259 model are shown in Fig. 6A and C, respectively. The three-dimensional structure of SIB1  
260 comprised five β-strands without an α-helix. The strands form a cylindrical shape, the so-  
261 called β-barrel. The five strands were named β1 to β5 starting from the N-terminus span  
262 residue 2 to 6, 10 to 14, 18 to 23, 36 to 38, and 44 to 48, respectively. The topology of  
263 the five β-strands is shown in Fig. 6B. Although three pairs of the β-strands (β1–β2, β2–  
264 β3, and β4–β5) are in the antiparallel orientation, only one pair, β3–β5, adopts a parallel  
265 form. This is a unique characteristic of SIB1 because the antiparallel β-barrel is the most  
266 common structure. A search using the structure comparison server DALI  
267 (<http://ekhidna2.biocenter.helsinki.fi/dali/>) suggested that no protein in the database

268 displays the SIB1-like five-strand  $\beta$ -barrel structure containing one parallel  $\beta$ -sheet. We  
269 found that the three-dimensional structure of SIB1 includes three disulfide bonds, all of  
270 which are located in the inner part of the molecule, as shown in Fig. 6C.

271

272 The electrostatic potential of the molecular surface of SIB1 is shown in Fig. 6D. An  
273 intriguing molecular surface property is seen at the top site of the  $\beta$ -barrel structure. A  
274 shallow bowl-like shape is formed by the long loop between  $\beta$ 3 and  $\beta$ 4. The central bed  
275 region of this area is positively charged, and this charge is surrounded by a hydrophobic  
276 rim.

277

278 As an additional analysis, we performed  $T_1$ ,  $T_2$ , and  $\{^1\text{H}\}$ - $^{15}\text{N}$  nuclear Overhauser effect  
279 spectroscopy (NOE) experiments to obtain information about the dynamics of each  
280 residue. These results are shown in Fig. S5. All  $1/T_1$ ,  $1/T_2$ , and  $\{^1\text{H}\}$ - $^{15}\text{N}$  NOE values  
281 indicated that the overall structure was rigid and stable in the NMR time scale. Slightly  
282 smaller  $\{^1\text{H}\}$ - $^{15}\text{N}$  NOE values were observed only for the loop regions, which suggested  
283 that the loops are more flexible than the  $\beta$ -strand regions. Unlike the loop regions,  
284 relatively higher  $1/T_2$  values were observed for few residues located in the  $\beta$ -strands, but  
285 such residues appeared sporadically through the amino acid sequence. Moreover, the  $1/T_1$   
286 and heteronuclear NOE did not show higher/lower values for such residues, indicating no  
287 further information about the rigidity. The analyses of the dynamics suggested that the  
288 poor plasticity of the SIB1 conformation makes it difficult to deduce the functional site  
289 involved in the conformational selection needed to adapt to the target. The classical key-  
290 and-lock binding manner might be proposed, but identification of the target binding  
291 region is not possible at present.

292

293

## 294 **Discussion**

295 In this study, we selected effector candidate genes of *C. orbiculare* that were highly  
296 expressed at 1 dpi after inoculation of the pathogen on *N. benthamiana* and performed  
297 functional screening using an *Agrobacterium*-mediated transient expression assay in *N.*  
298 *benthamiana*. We identified CE6 as a factor that caused cell death in *N. benthamiana*.

299 Importantly, we also identified two novel effectors of *C. orbiculare*, named SIB1 and  
300 SIB2, that suppressed *N. benthamiana* immunity against *C. orbiculare*. *SIB1* was found  
301 to be conserved in the genome of 18 *Colletotrichum* species but was not found outside  
302 the *Colletotrichum* genus. Homologs encoding the amino acid sequence identical to that  
303 of *C. orbiculare* SIB1 were found in *C. spinosum*, *C. trifolii*, and *C. sidae*, which also  
304 belong to the orbiculare clade (33). *SIB2* homologs were identified in the genome of 24  
305 *Colletotrichum* species, including *C. spinosum* and *C. trifolii* but not in *C. sidae*.

306

307 We focused on SIB1 in this study. SIB1 suppressed the flg22-triggered ROS burst in *N.*  
308 *benthamiana*. Plant NADPH oxidases, also known as respiratory burst oxidase homologs  
309 (RBOHs), produce ROS (34). An RBOHB (*NbRBOHB*) of *N. benthamiana* plays crucial  
310 roles in ROS production triggered by PAMPs, such as bacterial flagellin and fungal chitin,  
311 and facilitates plant immunity against biotrophic pathogens such as the oomycete  
312 pathogen *P. infestans* (35-37). SIB1 also partially suppressed INF1-induced cell death in  
313 *N. benthamiana*. It has been reported that the silencing of *Rboh* genes leads to a reduction  
314 and delay in HR cell death caused by INF1 in *N. benthamiana* (37). Therefore, SIB1-  
315 mediated suppression of the ROS burst may be involved in the SIB1-mediated  
316 suppression of INF1-induced cell death. On the other hand, *NbRbohB* silencing decreases  
317 resistance to *P. infestans* but not to *C. orbiculare* (35). Therefore, the increased  
318 susceptibility of *N. benthamiana* to *C. orbiculare* via transient expression of SIB1 is  
319 unlikely to depend on the SIB1-mediated suppression of the ROS burst. SIB1 may be able  
320 to suppress other immune responses in addition to the ROS burst.

321

322 In the case of *C. orbiculare* inoculation on *N. benthamiana*, RT-qPCR analysis suggested  
323 that the expression of *SIB1* was highest at 12 hpi, when the pathogen has already  
324 developed appressoria for host invasion, and was strongly reduced at 72 hpi. This result  
325 suggests that SIB1 may contribute to the primary stage of host invasion. By contrast, in  
326 the case of *C. orbiculare* inoculation on cucumber, the expression of *SIB1* was highest at  
327 48 hpi and its expression level remained high at 72 hpi. These findings suggest that *C.*  
328 *orbiculare* changes the expression pattern of effector genes, including *SIB1*, during  
329 infection of two unrelated susceptible plants, cucumber and *N. benthamiana*. In addition,  
330 the inoculation assays using the *SIB1*-knockout mutants revealed that *SIB1* was not

331 essential for the virulence of *C. orbiculare* on *N. benthamiana*, cucumber, and melon,  
332 although the transient expression of SIB1 in *N. benthamiana* increased the susceptibility  
333 to *C. orbiculare*. We now consider that other effectors of *C. orbiculare* may have  
334 functional redundancy with SIB1.

335

336 The three-dimensional structure of SIB1 comprises five  $\beta$ -strands each with three  
337 disulfide bonds. A pair of  $\beta$ -strands forms a parallel  $\beta$ -sheet and the others are antiparallel.  
338 We tried homology searches to find proteins with SIB1-like topology. A search of SAS  
339 (<http://www.ebi.ac.uk/thornton-srv/databases/sas/>) and 3D-BLAST ([http://3d-  
340 blast.life.nctu.edu.tw/](http://3d-blast.life.nctu.edu.tw/)) found no similar structures in these databases. We also tried  
341 ProFunc (<http://www.ebi.ac.uk/thornton-srv/databases/cgi-bin/profunc>), and the survey  
342 suggested two antifungal proteins comprising five  $\beta$ -strands (PDB codes: 2KCN and  
343 1AFP) as the structural neighbors, but both of them show all antiparallel  $\beta$ -barrel topology.  
344 These results suggest that SIB1 displays a novel structural feature and that these structural  
345 characteristics may be related to the functional mechanism of SIB1.

346

347 We observed pyroglutamylation of SIB1 at the N-terminus in the present study. Similar  
348 N-terminal modification has been reported for many peptides and proteins. For example,  
349 brazzein, a sweet-tasting protein of African plants that adopts a well-known protein fold  
350 seen in defensins and arthropod toxins, has a pyroglutamylated N-terminal end (38). This  
351 modification may be necessary for preventing protein degradation in host cells (39).  
352 Therefore, it is possible that the N-terminal modification of SIB1 occurs in nature and  
353 functions to extend its lifetime in plant cells. For further understanding of the molecular  
354 function of the effector SIB1, especially in the suppression of immunity in *N.*  
355 *benthamiana*, further studies are needed for the comprehensive mutational analyses of  
356 SIB1 based on the unraveled SIB1 structure and identification of the *N. benthamiana*  
357 proteins targeted by SIB1.

358

## 359 **Materials and Methods**

360

### 361 **Fungal strains and culture condition**

362 *C. orbiculare* strain 104-T (MAFF240422) (stock culture of the Laboratory of Plant  
363 Pathology, Kyoto University) was used as the wild-type strain. For targeted gene  
364 disruption of *SIB1*, we generated the *lig4*Δ strain from 104-T and used this strain as the  
365 parental strain in this study. All fungal strains were maintained on PDA medium (3.9%  
366 [wt/vol] PDA; Nissui, Tokyo, for 104-T) at 24°C in the dark.

367

### 368 **Plasmid constructions**

369 To express candidate genes in plants, pBICP35-CE1–CE8 transient expression vectors  
370 under the control of the 35S promoter were constructed using an In-Fusion system  
371 (Clontech, TaKaRa). The fragment containing the cDNA of CE1 was amplified with the  
372 primers 35S\_CE1\_Fw and 35S\_CE1\_Rv. The fragment was contained in a *Bam*HI site  
373 and was introduced into the *Bam*HI site of pBICP35, producing pBICP35-CE1. The other  
374 candidate gene plasmids used for transient expression were constructed in a similar way  
375 as pBICP35-CE1.

376

377 To delete *LIG4* of *C. orbiculare* (GenBank accession number, TDZ18841), we first  
378 generated pBATTEFPGEN. The geneticin-resistant gene cassette was amplified from  
379 pII99 (40) with the primers GENAS1B and GENS1X, and the amplified fragment was  
380 digested with *Xba*I and *Bam*HI, and then introduced into pBATTEFP (41), resulting in  
381 pBATTEFPGEN. The 5'-upstream region of *LIG4* in *C. orbiculare* was amplified using  
382 genomic PCR with the primers CoLIG5SN2 and CoLIG5ASN2. The fragment was  
383 digested with *Not*I and introduced into pBATTEFPGEN, resulting in pBATTEFPGEN5L.  
384 The 3'-downstream region of *LIG4* was amplified with the primers CoLIG3SA5 and  
385 CoLIG3ASA5. The fragment was digested with *Apa*I and introduced into  
386 pBATTEFPGEN5L, resulting in pBATTEFPGENLIG4KO.

387

388 To delete *SIB1* of *C. orbiculare*, we constructed a gene-disruption vector, pCB1636SIB1,  
389 using the two-step In-Fusion strategy (Clontech, TaKaRa). First, the ~2.0-kb upstream  
390 region of *SIB1* was amplified using PCR with the primers SIB1\_Up\_Fw and  
391 SIB1\_Up\_Rv, and the fragment was digested with *Apa*I. This fragment was then  
392 introduced into the *Apa*I-digested pCB1636 (42), resulting in pCB1636S5. Second, the  
393 ~2.0-kb downstream region of *SIB1* was amplified using PCR with the primers  
394 SIB1\_Down\_Fw and SIB1\_Down\_Rv, and the fragment was digested with *Eco*RI. This

395 fragment was introduced into the *Eco*RI-digested pCB1636S5, resulting in  
396 pCB1636SIB1. The primers used for plasmid construction are listed in Table S2.

397

398 To produce SIB1 protein in tobacco BY-2 cells, we designed the amino acid sequence for  
399 the SIB1 protein fused with an extracellular signal peptide of *Arabidopsis* chitinase (SP-  
400 SIB1). Next, artificial *SP-SIB1* was synthesized by optimizing the codons in tobacco and  
401 introducing restriction enzyme sites for cloning at both ends (IDT, Coralville, IA, USA;  
402 Table S2). The artificial *SP-SIB1* was introduced into a chemically inducible tobamovirus  
403 vector (pBICLBSEr-ToMV) (28). The resultant plasmid was named pBICLBSEr-  
404 ToMV-SP-SIB1.

405

#### 406 **RNA isolation and sequencing**

407 RNA was isolated as previously described (5). In brief, total RNA from conidia  
408 containing 3-day-old hyphae grown in potato dextrose broth at 25°C and infected *N.*  
409 *benthamiana* leaves at dpi 1, 3, and 7 were isolated using a Plant RNeasy Mini kit with  
410 DNase I treatment (Qiagen, Hilden, Germany). Three biological replicates were prepared  
411 for each tissue type. Unstranded RNAseq libraries were prepared from Poly(A)+-tailed  
412 RNA using a TruSeq Sample Prep kit according to the manufacturer's instructions before  
413 sequencing on an Illumina HiSeq 2000 sequencer to 50 bp in single-read mode. Reads  
414 were mapped to the *C. orbiculare* genome (version 2 accession number, AMCV02000000)  
415 using STAR version 2.6.0a (43) with the setting --alignIntronMax 1000. Read counts  
416 were obtained using Rsubread (v1.32.2) (44) using the following settings:  
417 isGTFAnnotationFile = TRUE, GTF.featureType = "exon", GTF.attrType = "Parent".  
418 Reads per kilobase million values (45) were calculated using edgeR (46) after applying  
419 calcNormFactors.

420

#### 421 ***Agrobacterium tumefaciens*-mediated transient expression assay in *N. benthamiana***

422 For the agroinfiltration assay, *N. benthamiana* plants (5 to 6 weeks old) were used. Plants  
423 were grown in a controlled environment chamber at 25°C with 16 h of illumination per  
424 day. Each construct was transformed into *Agrobacterium tumefaciens* strain GV3101 by  
425 electroporation. Each *Agrobacterium* was cultured in Luria–Bertani medium broth  
426 containing kanamycin (50 µg/mL), rifampicin (50 µg/mL), and gentamicin (50 µg/mL).  
427 The cells were harvested by centrifugation and then resuspended in MMA induction

428 buffer (1 L of MMA: 5 g of Murashige and Skoog salts, 1.95 g of MES, 20 g of sucrose,  
429 and 200  $\mu$ M acetosyringone, pH 5.6). All suspensions (OD<sub>600</sub> = 0.3) of the  
430 *Agrobacterium* strains were incubated for 1 h before being infiltrated into *N. benthamiana*  
431 leaves using a needleless syringe.

432

#### 433 **Virulence-enhancement assay**

434 *N. benthamiana* leaves were infiltrated with each *A. tumefaciens*. The infiltrated leaves  
435 were incubated for 2 days, after which 10  $\mu$ L of conidial suspensions ( $5 \times 10^5$  conidia/mL)  
436 of the *C. orbiculare* wild-type strain were drop-inoculated onto the infiltration areas of  
437 detached *N. benthamiana* leaves. Inoculated leaves were incubated at 24°C for 5 days.  
438 Quantitative assessment of lesion development was obtained using ImageJ for three  
439 biological replicates

440

#### 441 **Suppression assay of INF1-induced cell death**

442 Each tested gene was expressed in the *A. tumefaciens*-mediated transient expression assay  
443 as mentioned above. At 1 day after the first agroinfiltration, the second agroinfiltration  
444 with recombinant *A. tumefaciens* carrying p35S-INF1 was performed at same infiltration  
445 site. All suspensions (OD<sub>600</sub> = 0.3) of the *Agrobacterium* strains were incubated for 1 h  
446 before infiltration. The suspensions were infiltrated into *N. benthamiana* leaves using a  
447 needleless syringe. INF1-induced lesions were observed at 3 to 5 days after the second  
448 infiltration.

449

#### 450 **ROS assay**

451 ROS production was monitored using a luminol-based assay (47). Leaf discs were made  
452 using a circular borer (diameter, 5 mm), and the collected leaf discs were incubated  
453 overnight in distilled water. For measurement of ROS production, leaf discs were placed  
454 in a 96-well plate containing 50  $\mu$ L of distilled water and 50  $\mu$ L of assay solution  
455 containing 20 mM Luminol (Sigma-Aldrich, St. Louis, A8511), and 1 mg/mL peroxidase  
456 (Sigma-Aldrich, St. Louis, P6782) and 0.5  $\mu$ M flg22 (Invitrogen) were added to the wells.  
457 Luminescence was measured using a Luminoskan Ascent 2.1 (Thermo Fisher Scientific,  
458 Yokohama, Japan).

459

#### 460 **RT-qPCR analysis of *SIB1* expression**

461 Cucumber cotyledons were drop-inoculated with conidial suspension ( $1 \times 10^6$  conidia/mL)  
462 of the *C. orbiculare* wild-type strain covering as much as possible of the abaxial surface.  
463 After incubation for 0, 4, 8, 12, 24, 48, and 72 h, the inoculated epidermis containing the  
464 fungal cells was peeled off from three cotyledons for each sample and immediately frozen  
465 in liquid nitrogen to fix the gene expression profile. As for the preparation of 0 h samples,  
466 once conidial suspensions were inoculated, inoculated epidermis were immediately  
467 peeled off. As for inoculation on *N. benthamiana*, leaves were spray-inoculated with  
468 conidial suspension ( $1 \times 10^6$  conidia/mL) of the *C. orbiculare* wild-type strain. Then the  
469 whole leaves were frozen at particular time point in liquid nitrogen to fix gene expression  
470 profiles, one leaf for each sample. The frozen tissues were ground and total RNA was  
471 extracted by using the Agilent Plant RNA Isolation Mini Kit (Agilent Technologies).  
472 Three biological replicates were prepared for each time point. The relative gene  
473 expression of *SIB1* was assessed by RT-qPCR using primers SIB1\_qRT\_F and  
474 SIB1\_qRT\_R (Table S2). The TB Green™ Premix Ex Taq™ (TaKaRa) was used with a  
475 Thermal Cycler Dice Real Time System TP800 (TaKaRa) for RT-qPCR. The relative  
476 expression levels were normalized against the *C. orbiculare* actin gene (GenBank  
477 accession number, AB778553.1).

478

#### 479 **Transformation of BY-2 cells**

480 Tobacco BY-2 cells were grown in Linsmaier and Skoog medium supplemented with 3%  
481 sucrose and 0.2 mg/L 2,4-dichlorophenoxyacetic acid at 26°C (48). To generate the *SP*-  
482 *SIB1*-expressing transgenic line, pBICHgLBSXVE expressing the artificial transcription  
483 factor XVE, which activates transcription by binding with 17β-estradiol (28), and  
484 pBICLBSER-ToMV-SP-SIB1 were introduced into tobacco BY-2 cells using the  
485 *Agrobacterium* method (49). Transgenic lines were selected on agar medium containing  
486 the appropriate selective agents, 50 mg/L hygromycin, 100 mg/L kanamycin, and 500  
487 mg/L carbenicillin. Suspended cells developed from calli were grown in 3 mL of liquid  
488 medium in six-well culture plates during the primary screening, after which they were  
489 transferred to 150 mL of liquid medium in 500-mL flasks with constant shaking at 135  
490 rpm. After the initial culture for 2–3 weeks, the suspension cells were maintained without  
491 selective agents. These cell lines were suspension-cultured in normal MS medium and  
492 MS medium labeled with an  $^{15}\text{N}$  nitrogen source for NMR analysis.

493



#### 494 **Protein production and purification**

495 Protein production was induced by adding 10  $\mu$ M 17 $\beta$ -estradiol (28). After 4 days, SIB1  
496 protein had accumulated in the culture medium, and the culture medium was collected by  
497 centrifugation. For the first purification, the ammonium sulfate precipitation method was  
498 performed, and the protein in the 60% ammonium sulfate supernatant was mostly SIB1  
499 protein. The solvent of the supernatant was replaced with phosphate buffer (pH 6.8) by  
500 dialysis. Next, the supernatant was purified by gel filtration chromatography using AKTA  
501 prime plus (GE Healthcare, Buckinghamshire, UK) to obtain a single protein. For the gel  
502 filtration chromatography purification, a Superdex 75 10/300 GL column (Amersham  
503 Biosciences, Uppsala, Sweden) was used, and the buffer was phosphate buffer (pH 6.8)  
504 at a flow rate of 0.1 mL min<sup>-1</sup> at room temperature. Elution was monitored by absorbance  
505 at 280 nm. The collected fraction was concentrated using a centrifugal concentrator (CC-  
506 105, Tomy Seiko Inc., Tokyo, Japan) and then used for NMR analysis.

507

#### 508 **Gene disruption in *C. orbiculare***

509 To delete *SIB1*, we first generated the *lig4* $\Delta$  strain from 104-T, in which the homologous  
510 recombination ratio is expected to be increased, because DNA ligase 4 (Lig4) is reported  
511 to be a key molecule in the nonhomologous end-joining pathway (24). To generate the  
512 *lig4*-knockout strain, we introduced pBATTEFPGENLIG4KO into protoplasts of *C.*  
513 *orbiculare* 104-T. Preparation of protoplasts and transformation of *C. orbiculare* were  
514 performed according to a method described previously (50). We first selected geneticin-  
515 resistant transformants, and the bialaphos-sensitive transformants were selected from the  
516 geneticin-resistant transformants. The selected bialaphos-sensitive transformants were  
517 subjected to genomic PCR analysis using the primers Co5-Jcheck3 and J-check-  
518 CoLIG3AS to check the disruption of *LIG4*. The *lig4* $\Delta$  strains obtained exhibited colony  
519 growth, conidiation, and virulence on cucurbits to the same extent as the parental wild-  
520 type strain 104-T. To generate *SIB1*-knockout mutants, we introduced the gene-disruption  
521 vector pCB1636SIB1 into protoplasts of the *C. orbiculare lig4* $\Delta$  strain (generated in the  
522 104-T background as described above). We selected hygromycin-resistant transformants.  
523 Transformants were then analyzed by genomic PCR with the primers SIB1\_col\_F and  
524 SIB1\_col\_R. Hygromycin-resistant, geneticin-resistant, and bialaphos-sensitive  
525 transformants were selected in regeneration medium containing hygromycin B (100  
526  $\mu$ g/mL), geneticin (200  $\mu$ g/mL), and bialaphos (25  $\mu$ g/mL), respectively.

527

528 **Inoculation of *N. benthamiana*, cucumber, and melon**

529 Conidial suspensions collected from the 7-day-old colony of each strain formed on PDA  
530 were drop-inoculated onto detached *N. benthamiana* leaves, and cotyledons of cucumber  
531 and melon; the volume was 10  $\mu$ L for each drop. All conidial suspensions were used at a  
532 concentration of  $5 \times 10^5$  conidia/mL. In *N. benthamiana*, the leaves were collected from  
533 5–6-week-old plants. The cotyledons of cucumber and melon were derived from 10-day-  
534 old plants. The phenotype of lesions developed was observed after incubation for 7 days  
535 at 24°C.

536

537 **MS analyses**

538 Samples with 0.1% trifluoroacetic acid (TFA) were filtered through a 0.45- $\mu$ m filter, and  
539 the filtrates were injected directly into a C18 column (4.6 mm inner diameter  $\times$  250 mm,  
540 Protein-R; Nacalai Tesque, Kyoto, Japan) equilibrated with 100% mobile phase A (0.1%  
541 TFA in water). Samples were separated with a linear gradient from 0% to 50% mobile  
542 phase B (0.1% TFA in acetonitrile) in 40 min at a 0.5-mL/min flow rate. The eluate was  
543 monitored at 220 nm, and the fraction including SIB1 was verified by matrix-assisted  
544 laser desorption/ionization time-of-flight mass spectrometry (MALDI-TOF-MS;  
545 ultrafleXtreme, Bruker, Billerica, MA, USA). The peptide concentration was estimated  
546 using a BCA protein assay reagent kit (Thermo Fisher Scientific, Waltham, MA, USA).

547

548 To confirm the pyroglutamylation of SIB1, 5  $\mu$ g (1  $\mu$ g/ $\mu$ L) of SIB1 dissolved in buffer (6  
549 M urea and 0.1 M triethylammonium bicarbonate (TEAB)) was incubated for reduction  
550 with 2 mM Tris(2-carboxyethyl)phosphine (TCEP) for 30 min at 37°C followed by  
551 alkylation with 55 mM iodoacetamide (IAA) in the dark for 30 min at room temperature.  
552 The sample solution was acidified with 10% TFA and desalted using SDB-Stage Tip (51).  
553 The desalted sample was dried under vacuum and dissolved in buffer (50 mM Na<sub>2</sub>PO<sub>4</sub>,  
554 pH 7.0, 10 mM dithiothreitol, and 1 mM ethylenediaminetetraacetic acid), and 10  $\mu$ L (1  
555 mU) of *Pfu* PGAP (TaKaRa) was added. After incubation for 5 h at 50°C, the sample was  
556 acidified with 10% TFA, desalted using SDB-Stage Tip, and dried under vacuum. The  
557 PGAP-treated sample was analyzed using MALDI-TOF-MS. The Unimod database  
558 (<http://www.unimod.org>) was used to analyze the posttranscriptional modification.

559

560 To examine whether Cys residues of SIB1 were in the oxidized form, 15  $\mu\text{g}$  (1  $\mu\text{g}/\mu\text{L}$ ) of  
561 SIB1 dissolved in buffer (6 M urea and 0.1 M TEAB) was used as the stock solution.  
562 Using this stock, three samples at different conditions were prepared: (i) untreated, (ii)  
563 alkylated with 55 mM IAA under nonreducing conditions, and (iii) reduced with 2 mM  
564 TCEP and alkylated with 55 mM IAA. All three samples were acidified with 10% TFA  
565 and desalted using SDB-Stage Tip. The desalted sample was dried under vacuum and  
566 analyzed using MALDI-TOF-MS. The disulfide linkages were determined using the  
567 method reported previously (52). SIB1 (5  $\mu\text{g}$ , 1  $\mu\text{g}/\mu\text{L}$ ) was dissolved in buffer (6 M urea  
568 and 0.1 M TEAB) and Lys-C was added to the sample at a 1:100 ratio of Lys-C. After  
569 overnight digestion at 37°C, the sample solution was acidified with 10% TFA and  
570 desalted using SDB-Stage Tip. The desalted solution was dried under vacuum and  
571 analyzed using MALDI-TOF-MS. The assignment of peaks derived from peptides with  
572 disulfide linkages was performed using BioTools (Bruker Daltonics).

573

#### 574 **NMR study of SIB1**

575  $^{15}\text{N}$ -labeling of SIB1 using the BY-2 system was performed using the method reported  
576 previously (27,29,30), and the sample was purified as described above. The  $^{15}\text{N}$ -labeled  
577 NMR sample was prepared at a concentration of 0.8 mM dissolved in  $\text{H}_2\text{O}$  containing 10%  
578  $\text{D}_2\text{O}$  and 100 mM KCl. The sample pH was adjusted to 6.3 by direct reading with a pH  
579 meter. All NMR data were recorded on a Bruker AVANCE III 800 equipped with a TCI  
580 cryogenic probe. The sample temperature during the NMR experiments was kept at  
581 25.0°C.

582

583 To determine the structure,  $^1\text{H}$ - $^{15}\text{N}$  HSQC (53,54),  $^{15}\text{N}$ -edited NOESY (55),  $^{15}\text{N}$ -edited  
584 TOCSY (56), NOESY (57) and TOCSY (58) were observed. The NOE mixing time and  
585 TOCSY spin-lock time were set as 100 and 70 ms, respectively. In addition, heteronuclear  
586  $\{^1\text{H}\}$ - $^{15}\text{N}$  NOE experiments (59) were performed to provide information about the  
587 internal protein dynamics. Water suppression in the NMR experiments was achieved  
588 using WATERGATE (60) or a water flip-back pulse (61). All FID data were processed  
589 using NMRPipe (62) and analyzed on Sparky (63). The distance constraints were  
590 obtained from NOE peaks. The angle constraints were obtained using TALOS+ (64)

591 analysis using  $^1\text{HN}$ ,  $^{15}\text{N}$ , and  $\alpha^1\text{H}$  chemical shifts. The three-dimensional structure of  
592 SIB1 was calculated using CYANA (65) and NMR-based constraints. The structural  
593 figures were generated using MOLMOL (66) or PyMOL (67).

594

595 The pulse sequences used to study protein dynamics have been published (68). In our  
596 study, the  $T_1$  relaxation analysis used a series of 10 experiments with relaxation delays  
597 set at 75, 100, 150, 200, 250, 300, 400, 500, 700, and 950 ms. Similar to the  $T_1$   
598 experiments,  $T_2$  measurements were also performed as a series of 10 experiments with  
599 different relaxation delays of 25, 60, 80, 120, 150, 200, 300, 400, 500, and 750 ms. The  
600  $T_1$  and  $T_2$  values were estimated by fitting the peak volume,  $I$ , using the equation,  $I = I_0$   
601  $\exp(-t/T_{1,2})$ . As for the heteronuclear NOE experiments, a 5-s recycle delay was used after  
602 each scan. The NOE values were obtained by calculating the ratio of the peak intensity  
603 recorded with the saturation of protons divided by the peak intensity recorded without  
604 saturation.

605

#### 606 **Data deposition**

607 Protein structure coordinate data are available at Protein Data Bank (PDB)  
608 (<https://www.rcsb.org/>). Accession codes for the structural coordinates and chemical  
609 shifts deposited in the PDB and Biological Magnetic Resonance Data Bank (BMRB) are  
610 7EAU and 36412, respectively. RNAseq data are accessible in NCBI's Gene Expression  
611 Omnibus (GEO) database under GEO Series accession number GSE178879.

612

#### 613 **Acknowledgements**

614 The authors thank all technicians working at Center for Nano Materials and Technology  
615 (CNMT), Japan Advanced Institute of Science and Technology (JAIST) for maintenance  
616 of instruments used in this work. The authors also thank Akiko Mizuno and Hiroko  
617 Hayashi in Ishikawa Prefectural University and Fumika Takahashi in Kyoto University  
618 for excellent technical assistance. The authors also thank Manaka Iino for his contribution  
619 to a part of the NMR data analyses. This work was supported by Grants-in-Aid for  
620 Scientific Research (18H02204 and 21H04725 to Y.T., 17K08194 to S.O., 17H06172 to  
621 K.S., 19K15846 to P.G) (KAKENHI).

622

623 **References**

624

- 625 1. Chisholm, S. T., Coaker, G., Day, B., and Staskawicz, B. J. (2006) Host-microbe  
626 interactions: shaping the evolution of the plant immune response. *Cell* **124**, 803-  
627 814
- 628 2. Jones, J. D., and Dangl, J. L. (2006) The plant immune system. *Nature* **444**, 323-  
629 329
- 630 3. Win, J., Chaparro-Garcia, A., Belhaj, K., Saunders, D. G., Yoshida, K., Dong, S.,  
631 Schornack, S., Zipfel, C., Robatzek, S., Hogenhout, S. A., and Kamoun, S. (2012)  
632 Effector biology of plant-associated organisms: concepts and perspectives. *Cold*  
633 *Spring Harb. Symp. Quant. Biol.* **77**, 235-247
- 634 4. Cui, H., Tsuda, K., and Parker, J. E. (2015) Effector-triggered immunity: from  
635 pathogen perception to robust defense. *Annu. Rev. Plant Biol.* **66**, 487-511
- 636 5. Gan, P., Ikeda, K., Irieda, H., Narusaka, M., O'Connell, R. J., Narusaka, Y.,  
637 Takano, Y., Kubo, Y., and Shirasu, K. (2013) Comparative genomic and  
638 transcriptomic analyses reveal the hemibiotrophic stage shift of *Colletotrichum*  
639 fungi. *New Phytol.* **197**, 1236-1249
- 640 6. O'Connell, R. J., Thon, M. R., Hacquard, S., Amyotte, S. G., Kleemann, J., Torres,  
641 M. F., Damm, U., Buiate, E. A., Epstein, L., Alkan, N., Altmuller, J., Alvarado-  
642 Balderrama, L., Bauser, C. A., Becker, C., Birren, B. W., Chen, Z., Choi, J.,  
643 Crouch, J. A., Duvick, J. P., Farman, M. A., Gan, P., Heiman, D., Henrissat, B.,  
644 Howard, R. J., Kabbage, M., Koch, C., Kracher, B., Kubo, Y., Law, A. D., Lebrun,  
645 M. H., Lee, Y. H., Miyara, I., Moore, N., Neumann, U., Nordstrom, K.,  
646 Panaccione, D. G., Panstruga, R., Place, M., Proctor, R. H., Prusky, D., Rech, G.,  
647 Reinhardt, R., Rollins, J. A., Rounsley, S., Schardl, C. L., Schwartz, D. C., Shenoy,  
648 N., Shirasu, K., Sikhakolli, U. R., Stuber, K., Sukno, S. A., Sweigard, J. A.,  
649 Takano, Y., Takahara, H., Trail, F., van der Does, H. C., Voll, L. M., Will, I.,  
650 Young, S., Zeng, Q., Zhang, J., Zhou, S., Dickman, M. B., Schulze-Lefert, P., Ver  
651 Loren van Themaat, E., Ma, L. J., and Vaillancourt, L. J. (2012) Lifestyle  
652 transitions in plant pathogenic *Colletotrichum* fungi deciphered by genome and  
653 transcriptome analyses. *Nat. Genet.* **44**, 1060-1065

- 654 7. Perfect, S. E., Hughes, H. B., O'Connell, R. J., and Green, J. R. (1999)  
655 *Colletotrichum*: A model genus for studies on pathology and fungal-plant  
656 interactions. *Fungal Genet. Biol.* **27**, 186-198
- 657 8. Kubo, Y., Nakamura, H., Kobayashi, K., Okuno, T., and Furusawa, I. (1991)  
658 Cloning of a melanin biosynthetic gene essential for appressorial penetration of  
659 *Colletotrichum lagenarium*. *Mol. Plant Microbe Interact.* **4**, 440-445
- 660 9. Kubo, Y., and Takano, Y. (2013) Dynamics of infection-related morphogenesis  
661 and pathogenesis in *Colletotrichum orbiculare*. *J. Gen. Plant Pathol.* **79**, 233-242
- 662 10. Cannon, P. F., Damm, U., Johnston, P. R., and Weir, B. S. (2012) *Colletotrichum*  
663 - current status and future directions. *Stud. Mycol.* **73**, 181-213
- 664 11. Liu, B., Wasilwa, L. A., Morelock, T. E., O'Neill, N. R., and Correll, J. C. (2007)  
665 Comparison of *Colletotrichum orbiculare* and several allied *Colletotrichum* spp.  
666 for mtDNA RFLPs, intron RFLP and sequence variation, vegetative compatibility,  
667 and host specificity. *Phytopathology* **97**, 1305-1314
- 668 12. Goodin, M. M., Zaitlin, D., Naidu, R. A., and Lommel, S. A. (2008) *Nicotiana*  
669 *benthamiana*: its history and future as a model for plant-pathogen interactions.  
670 *Mol. Plant Microbe Interact.* **21**, 1015-1026
- 671 13. Shen, S., Goodwin, P. H., and Hsiang, T. (2001) Infection of *Nicotiana* species  
672 by the anthracnose fungus, *Colletotrichum orbiculare*. *Eur. J. Plant Pathol.* **107**,  
673 767-773
- 674 14. Takano, Y., Takayanagi, N., Hori, H., Ikeuchi, Y., Suzuki, T., Kimura, A., and  
675 Okuno, T. (2006) A gene involved in modifying transfer RNA is required for  
676 fungal pathogenicity and stress tolerance of *Colletotrichum lagenarium*. *Mol.*  
677 *Microbiol.* **60**, 81-92
- 678 15. Irieda, H., Maeda, H., Akiyama, K., Hagiwara, A., Saitoh, H., Uemura, A.,  
679 Terauchi, R., and Takano, Y. (2014) *Colletotrichum orbiculare* secretes virulence  
680 effectors to a biotrophic interface at the primary hyphal neck via exocytosis  
681 coupled with SEC22-mediated traffic. *Plant Cell* **26**, 2265-2281
- 682 16. Yoshino, K., Irieda, H., Sugimoto, F., Yoshioka, H., Okuno, T., and Takano, Y.  
683 (2012) Cell Death of *Nicotiana benthamiana* is induced by secreted protein NIS1  
684 of *Colletotrichum orbiculare* and is suppressed by a homologue of CgDN3. *Mol.*  
685 *Plant Microbe Interact.* **25**, 625-636

- 686 17. Isozumi, N., Inoue, Y., Imamura, T., Mori, M., Takano, Y., and Ohki, S. (2019)  
687 Ca<sup>2+</sup>-dependent interaction between calmodulin and CoDN3, an effector of  
688 *Colletotrichum orbiculare*. *Biochem. Biophys. Res. Commun.* **514**, 803-808
- 689 18. Irieda, H., Inoue, Y., Mori, M., Yamada, K., Oshikawa, Y., Saitoh, H., Uemura,  
690 A., Terauchi, R., Kitakura, S., Kosaka, A., Singkaravanit-Ogawa, S., and Takano,  
691 Y. (2019) Conserved fungal effector suppresses PAMP-triggered immunity by  
692 targeting plant immune kinases. *Proc. Natl. Acad. Sci. U.S.A.* **116**, 496-505
- 693 19. Shimada, C., Lipka, V., O'Connell, R., Okuno, T., Schulze-Lefert, P., and Takano,  
694 Y. (2006) Nonhost resistance in *Arabidopsis-colletotrichum* interactions acts at  
695 the cell periphery and requires actin filament function. *Mol. Plant Microbe*  
696 *Interact.* **19**, 270-279
- 697 20. Inagaki, A., Takano, Y., Kubo, Y., Mise, K., and Furusawa, I. (2000) Construction  
698 of an equalized cDNA library from *Colletotrichum lagenarium* and its application  
699 to the isolation of differentially expressed genes. *Can. J. Microbiol.* **46**, 150-158
- 700 21. Armenteros, J. J. A., Tsirigos, K. D., Sonderby, C. K., Petersen, T. N., Winther,  
701 O., Brunak, S., von Heijne, G., and Nielsen, H. (2019) SignalP 5.0 improves signal  
702 peptide predictions using deep neural networks. *Nat. Biotechnol.* **37**, 420-423
- 703 22. Ramachandran, S. R., Yin, C. T., Kud, J., Tanaka, K., Mahoney, A. K., Xiao, F.  
704 M., and Hulbert, S. H. (2017) Effectors from wheat rust fungi suppress multiple  
705 plant defense responses. *Phytopathology* **107**, 75-83
- 706 23. Kanneganti, T. D., Huitema, E., Cakir, C., and Kamoun, S. (2006) Synergistic  
707 interactions of the plant cell death pathways induced by *Phytophthora infestans*  
708 Nep1-like protein PiNPP1.1 and INF1 elicitor. *Mol. Plant Microbe Interact.* **19**,  
709 854-863
- 710 24. Ninomiya, Y., Suzuki, K., Ishii, C., and Inoue, H. (2004) Highly efficient gene  
711 replacements in *Neurospora* strains deficient for nonhomologous end-joining.  
712 *Proc. Natl. Acad. Sci. U.S.A.* **101**, 12248-12253
- 713 25. Dohi, K., and Mori, M. (2007) Expression of active enzymes from an inducible  
714 tomato-mosaic-virus-based vector in cultured transgenic tobacco BY-2 cells.  
715 *Plant Biotechnology* **24**, 367-373
- 716 26. Dohi, K., Nishikiori, M., Tamai, A., Ishikawa, M., Meshi, T., and Mori, M. (2006)  
717 Inducible virus-mediated expression of a foreign protein in suspension-cultured  
718 plant cells. *Arch. Virol.* **151**, 1075-1084

- 719 27. Costa, L. M., Marshall, E., Tesfaye, M., Silverstein, K. A. T., Mori, M., Umetsu,  
720 Y., Otterbach, S. L., Papareddy, R., Dickinson, H. G., Boutiller, K., VandenBosch,  
721 K. A., Ohki, S., and Gutierrez-Marcos, J. F. (2014) Central cell-derived peptides  
722 regulate early embryo patterning in flowering plants. *Science* **344**, 168-172
- 723 28. Imamura, T., Isozumi, N., Higashimura, Y., Ohki, S., and Mori, M. (2021)  
724 Production of ORF8 protein from SARS-CoV-2 using an inducible virus-  
725 mediated expression system in suspension-cultured tobacco BY-2 cells. *Plant*  
726 *Cell Rep.* **40**, 433-436
- 727 29. Ohki, S., Dohi, K., Tamai, A., Takeuchi, M., and Mori, M. (2008) Stable-isotope  
728 labeling using an inducible viral infection system in suspension-cultured plant  
729 cells. *J. Biomol. NMR* **42**, 271-277
- 730 30. Ohki, S., Takeuchi, M., and Mori, M. (2011) The NMR structure of stomagen  
731 reveals the basis of stomatal density regulation by plant peptide hormones. *Nat.*  
732 *Commun.* **2**, 512
- 733 31. Ito, K., Ikemasu, T., and Ishikawa, T. (1992) Cloning and sequencing of the *xynA*  
734 gene encoding xylanase A of *Aspergillus kawachii*. *Biosci. Biotechnol. Biochem.*  
735 **56**, 906-912
- 736 32. Liao, Y. D., Wang, S. C., Leu, Y. J., Wang, C. F., Chang, S. T., Hong, Y. T., Pan,  
737 Y. R., and Chen, C. P. (2003) The structural integrity exerted by N-terminal  
738 pyroglutamate is crucial for the cytotoxicity of frog ribonuclease from *Rana*  
739 *pipiens*. *Nucleic Acids Res.* **31**, 5247-5255
- 740 33. Gan, P., Tsushima, A., Narusaka, M., Narusaka, Y., Takano, Y., Kubo, Y., and  
741 Shirasu, K. (2019) Genome sequence resources for four phytopathogenic fungi  
742 from the *Colletotrichum orbiculare* species complex. *Mol. Plant Microbe Interact.*  
743 **32**, 1088-1090
- 744 34. Marino, D., Dunand, C., Puppo, A., and Pauly, N. (2012) A burst of plant NADPH  
745 oxidases. *Trends Plant Sci.* **17**, 9-15
- 746 35. Asai, S., Ohta, K., and Yoshioka, H. (2008) MAPK signaling regulates nitric  
747 oxide and NADPH oxidase-dependent oxidative bursts in *Nicotiana benthamiana*.  
748 *Plant Cell* **20**, 1390-1406
- 749 36. Segonzac, C., Feike, D., Gimenez-Ibanez, S., Hann, D. R., Zipfel, C., and Rathjen,  
750 J. P. (2011) Hierarchy and roles of pathogen-associated molecular pattern-induced  
751 responses in *Nicotiana benthamiana*. *Plant Physiol.* **156**, 687-699



- 752 37. Yoshioka, H., Numata, N., Nakajima, K., Katou, S., Kawakita, K., Rowland, O.,  
753 Jones, J. D., and Doke, N. (2003) *Nicotiana benthamiana* gp91<sup>phox</sup> homologs  
754 *NbrbohA* and *NbrbohB* participate in H<sub>2</sub>O<sub>2</sub> accumulation and resistance to  
755 *Phytophthora infestans*. *Plant Cell* **15**, 706-718
- 756 38. Caldwell, J. E., Abildgaard, F., Dzakula, Z., Ming, D., Hellekant, G., and Markley,  
757 J. L. (1998) Solution structure of the thermostable sweet-tasting protein brazzein.  
758 *Nat. Struct. Mol. Biol.* **5**, 427-431
- 759 39. Graciet, E., Walter, F., O'Maoileidigh, D., Pollmann, S., Meyerowitz, E. M.,  
760 Varshavsky, A., and Wellmer, F. (2009) The N-end rule pathway controls  
761 multiple functions during *Arabidopsis* shoot and leaf development. *Proc. Natl.*  
762 *Acad. Sci. U.S.A.* **106**, 13618-13623
- 763 40. Namiki, F., Matsunaga, M., Okuda, M., Inoue, I., Nishi, K., Fujita, Y., and Tsuge,  
764 T. (2001) Mutation of an arginine biosynthesis gene causes reduced pathogenicity  
765 in *Fusarium oxysporum* f. sp *melonis*. *Mol. Plant Microbe Interact.* **14**, 580-584
- 766 41. Asakura, M., Ninomiya, S., Sugimoto, M., Oku, M., Yamashita, S., Okuno, T.,  
767 Sakai, Y., and Takano, Y. (2009) Atg26-mediated pexophagy is required for host  
768 invasion by the plant pathogenic fungus *Colletotrichum orbiculare*. *Plant Cell* **21**,  
769 1291-1304
- 770 42. Sweigard, J. A., Chumley, F. G., Carroll, A. M., Farrall, L., and Valent, B. (1997)  
771 A series of vectors for fungal transformation. *Fungal Genet. Newsl.* **44**, 52-53
- 772 43. Dobin, A., Davis, C. A., Schlesinger, F., Drenkow, J., Zaleski, C., Jha, S., Batut,  
773 P., Chaisson, M., and Gingeras, T. R. (2013) STAR: ultrafast universal RNA-seq  
774 aligner. *Bioinformatics* **29**, 15-21
- 775 44. Liao, Y., Smyth, G. K., and Shi, W. (2019) The R package Rsubread is easier,  
776 faster, cheaper and better for alignment and quantification of RNA sequencing  
777 reads. *Nucleic Acids Res.* **47**, e47
- 778 45. Mortazavi, A., Williams, B. A., McCue, K., Schaeffer, L., and Wold, B. (2008)  
779 Mapping and quantifying mammalian transcriptomes by RNA-Seq. *Nat. Methods*  
780 **5**, 621-628
- 781 46. Robinson, M. D., McCarthy, D. J., and Smyth, G. K. (2010) edgeR: a  
782 Bioconductor package for differential expression analysis of digital gene  
783 expression data. *Bioinformatics* **26**, 139-140

- 784 47. Keppler, L. D., Baker, C. J., and Atkinson, M. M. (1989) Active oxygen  
785 production during a bacteria-induced hypersensitive reaction in tobacco  
786 suspension cells. *Phytopathology* **79**, 974-978
- 787 48. Nagata, T., Nemoto, Y., and Hasezawa, S. (1992) Tobacco BY-2 cell line as the  
788 “HeLa” cell in the cell biology of higher plants. *Int. rev. cyt.* **132**, 1-30
- 789 49. Hagiwara, Y., Komoda, K., Yamanaka, T., Tamai, A., Meshi, T., Funada, R.,  
790 Tsuchiya, T., Naito, S., and Ishikawa, M. (2003) Subcellular localization of host  
791 and viral proteins associated with tobamovirus RNA replication. *EMBO J.* **22**,  
792 344-353
- 793 50. Takano, Y., Komeda, K., Kojima, K., and Okuno, T. (2001) Proper regulation of  
794 cyclic AMP-dependent protein kinase is required for growth, conidiation, and  
795 appressorium function in the anthracnose fungus *Colletotrichum lagenarium*. *Mol.*  
796 *Plant Microbe Interact.* **14**, 1149-1157
- 797 51. Rappsilber, J., Mann, M., and Ishihama, Y. (2007) Protocol for micro-purification,  
798 enrichment, pre-fractionation and storage of peptides for proteomics using  
799 StageTips. *Nat. Protoc.* **2**, 1896-1906
- 800 52. Isozumi, N., Masubuchi, Y., Imamura, T., Mori, M., Koga, H., and Ohki, S. (2021)  
801 Structure and antimicrobial activity of NCR169, a nodule-specific cysteine-rich  
802 peptide of *Medicago truncatula*. *Sci. Rep.* **11**, 9923
- 803 53. Bodenhausen, G., and Ruben, D. J. (1980) Natural abundance nitrogen-15 NMR  
804 by enhanced heteronuclear spectroscopy. *Chem. Phys. Lett.* **69**, 185-189
- 805 54. Kay, L. E., Keifer, P., and Saarinen, T. (1992) Pure absorption gradient enhanced  
806 heteronuclear single quantum correlation spectroscopy with improved sensitivity.  
807 *J. Am. Chem. Soc.* **114**, 10663-10665
- 808 55. Fesik, S., and Zuiderweg, E. R. P. (1988) Heteronuclear three-dimensional NMR  
809 spectroscopy. A strategy for the simplification of homonuclear two-dimensional  
810 NMR spectra. *J. Magn. Reson.* **78**, 588-593
- 811 56. Marion, D., Driscoll, P. C., Kay, L. E., Wingfield, P. T., Bax, A., Gronenborn, A.  
812 M., and Clore, G. M. (1989) Overcoming the overlap problem in the assignment  
813 of  $^1\text{H}$  NMR spectra of larger proteins by use of three-dimensional heteronuclear  
814  $^1\text{H}$ - $^{15}\text{N}$  Hartmann-Hahn-multiple quantum coherence and nuclear Overhauser-  
815 multiple quantum coherence spectroscopy: application to interleukin 1 beta.  
816 *Biochemistry* **28**, 6150-6156

- 817 57. Jeener, J., Meier, B. H., Bachman, P., and Ernst, R. R. (1979) Investigation of  
818 exchange processes by two-dimensional NMR spectroscopy. *J. Chem. Phys.* **71**,  
819 45-46
- 820 58. Bax, A., and Davis, D. G. (1985) MLEV-17-based two-dimensional homonuclear  
821 magnetization transfer spectroscopy. *J. Magn. Reson.* **65**, 355-360
- 822 59. Kay, L. E., Torchia, D. A., and Bax, A. (1989) Backbone dynamics of proteins as  
823 studied by <sup>15</sup>N inverse detected heteronuclear NMR spectroscopy: application to  
824 staphylococcal nuclease. *Biochemistry* **28**, 8972-8979
- 825 60. Piotto, M., Saudek, V., and Sklenar, V. (1992) Gradient-tailored excitation for  
826 single-quantum NMR spectroscopy of aqueous solutions. *J. Biomol. NMR* **2**, 661-  
827 665
- 828 61. Grzesiek, S., and Bax, A. (1993) The importance of not saturating water in protein  
829 NMR. Application to sensitivity enhancement and NOE measurements. *J. Am.*  
830 *Chem. Soc.* **115**, 12593-12594
- 831 62. Delaglio, F., Grzesiek, S., Vuister, G. W., Zhu, G., Pfeifer, J., and Bax, A. (1995)  
832 NMRPipe: a multidimensional spectral processing system based on UNIX pipes.  
833 *J. Biomol. NMR* **6**, 277-293
- 834 63. Goddard, T. D., and Kneller, D. G. (2008) <http://www.cgl.ucsf.edu/home/sparky>
- 835 64. Shen, Y., Delaglio, F., Cornilescu, G., and Bax, A. (2009) TALOS+: a hybrid  
836 method for predicting protein backbone torsion angles from NMR chemical shifts.  
837 *J. Biomol. NMR* **44**, 213-223
- 838 65. Lopez-Mendez, B., and Guntert, P. (2006) Automated protein structure  
839 determination from NMR spectra. *J. Am. Chem. Soc.* **128**, 13112-13122
- 840 66. Koradi, R., Billeter, M., and Wuthrich, K. (1996) MOLMOL: a program for  
841 display and analysis of macromolecular structures. *J. Mol. Graph.* **14**, 51-55, 29-  
842 32
- 843 67. Delano, W. L. (2002) Pymol: An open-source molecular graphics tool. *CCP4*  
844 *Newslett on Protein Crystallograph* **40**, 82-92
- 845 68. Buck, M., Boyd, J., Redfield, C., MacKenzie, D. A., Jeenes, D. J., Archer, D. B.,  
846 and Dobson, C. M. (1995) Structural determinants of protein dynamics: analysis  
847 of <sup>15</sup>N NMR relaxation measurements for main-chain and side-chain nuclei of hen  
848 egg white lysozyme. *Biochemistry* **34**, 4041-4055
- 849

850

851 **Abbreviations**

852 BY-2, *Nicotiana tabacum* cv. Bright Yellow 2; EK, enterokinase; ETI, effector-triggered  
853 immunity; HR, hypersensitive response; HSQC, heteronuclear single quantum coherence  
854 spectroscopy; IAA, iodoacetamide; MALDI-TOF-MS, matrix-assisted laser  
855 desorption/ionization time-of-flight mass spectrometry; NMR, nuclear magnetic  
856 resonance; NOESY, nuclear Overhauser effect spectroscopy; PAMP, pathogen-  
857 associated molecular patterns; PCD, programmed cell death; PTI, PAMP-triggered  
858 immunity; RBOHs, respiratory burst oxidase homologs; ROS, reactive oxygen species;  
859 SDS-PAGE, sodium dodecyl sulfate–polyacrylamide gel electrophoresis; TCEP, Tris(2-  
860 carboxyethyl)phosphine; TEAB, triethylammonium bicarbonate; TFA, trifluoroacetic  
861 acid; TOCSY, total correlation spectroscopy

862

863

## 864 **Figure Legends**

865

866 **Figure 1.** Decreased immunity to *C. orbiculare* caused by transient expression of the  
867 effector SIB1 or SIB2 in *N. benthamiana*. (A) Increased lesion development of *C.*  
868 *orbiculare* on *N. benthamiana* when *SIB1* or *SIB2* were transiently expressed. *N.*  
869 *benthamiana* leaves were infiltrated by *A. tumefaciens* harboring the plasmid expressing  
870 *SIB1*, the plasmid expressing *SIB2*, or the empty plasmid (EV), and the infiltrated leaves  
871 were incubated for 2 days and then drop-inoculated with conidial suspensions ( $5 \times 10^5$   
872 conidia/mL) of *C. orbiculare* 104-T. The photograph was taken at 5 dpi. (B)  
873 Quantification of lesion size on *N. benthamiana* leaves transiently expressing *SIB1* or  
874 *SIB2* after *C. orbiculare* inoculation. The lesion size in Fig. 1A was measured using  
875 ImageJ software for three biological replicates. The *t* test was used to identify significant  
876 differences. (C) *SIB1* and *SIB2* are conserved in *Colletotrichum* species. The amino acid  
877 sequence alignment of SIB1 or SIB2 with their orthologs of *Colletotrichum* species were  
878 shown. The alignments include the orthologs showing more than 75% amino acid identity  
879 obtained using a BlastP search of the NCBI non-redundant protein database using SIB1  
880 or SIB2 as the query sequences. They were derived from the diverse *Colletotrichum*  
881 species represented by Cspi (*C. spinosum*), Ctri (*C. trifolii*), Csid (*C. sidae*), Ccam (*C.*  
882 *camelliae*), Casi (*C. asianum*), Cfru (*C. fructicola*), Caen (*C. aenigma*), CSCO (*C.*  
883 *scovillei*), and Cnym (*C. nymphaeae*). The alignments were made using the ClustalW  
884 program. Identical residues in SIB1 or SIB2 are shaded in black, and conserved residues  
885 are shaded in gray. SP indicates the putative signal peptide region.

886

887 **Figure 2.** Suppression of *SIB1* by PAMP-triggered ROS generation and HR cell death in  
888 *N. benthamiana*. (A) flg22-triggered ROS production in *N. benthamiana* was inhibited  
889 by transient expression of *SIB1*. After treatment with 500 nM flg22, the total ROS  
890 production was measured in *N. benthamiana* transiently expressing *SIB1-HA*, or *MoNISI-*  
891 *HA* (positive control), or *eGFP* (negative control). (B) Partial suppression of *INF1-*  
892 induced cell death by *SIB1*. *N. benthamiana* leaves were first infiltrated with *A.*  
893 *tumefaciens* harboring a plasmid expressing *SIB1*, *eGFP* (negative control), or *MoNISI*  
894 (positive control). After 1 day, the second infiltration with *A. tumefaciens* harboring a

895 plasmid expressing *INF1* was performed, and the infiltrated leaves were incubated for 5  
896 days.

897

898 **Figure 3.** Gene expression and knockout analysis of *SIB1*. (A) Expression pattern of *SIB1*  
899 in *C. orbiculare* inoculated on *N. benthamiana* and cucumber. The conidial suspension  
900 of *C. orbiculare* wild-type strain ( $1 \times 10^6$  conidia per milliliter) was inoculated on *N.*  
901 *benthamiana* leaves or cucumber cotyledons. The total RNA of inoculated plants was  
902 extracted and subjected to RT-qPCR analysis to investigate *SIB1* expression. The *C.*  
903 *orbiculare* actin gene was used as the internal control. Mean and SD were calculated from  
904 three independent samples. (B) Gene disruption of *SIB1* had no visible effects on the  
905 virulence of *C. orbiculare* inoculated on *N. benthamiana*, cucumber, or melon. Conidial  
906 suspension ( $5 \times 10^5$  conidia/mL) of the parental *lig4* $\Delta$  strain or the *sib1* $\Delta$  strain (*lig4* $\Delta$   
907 background) was drop-inoculated on *N. benthamiana* leaves, cucumber cotyledons, and  
908 melon cotyledons, and the inoculated plants were incubated at 24°C for 7 days.

909

910 **Figure 4.** Confirmation of pyroglutamylation of *SIB1*. Pyroglutamate aminopeptidase  
911 (PGAP)-untreated (*upper panel*) and -treated (*lower panel*) *SIB1* were analyzed using  
912 MALDI-TOF-MS.

913

914 **Figure 5.** Determination of disulfide linkages of *SIB1*. (A) MALDI-TOF-MS spectra of  
915 *SIB1* after Lys-C treatment. (B) The assignments of SS linked peptides of *SIB1* obtained  
916 by Lys-C digestion.

917

918 **Figure 6.** Three-dimensional structure of *SIB1*. Overlay of 20 NMR structures (A),  
919 topology of five  $\beta$ -strands (B), ribbon model of the representative structure using a ball-  
920 and-stick representation of the three disulfide bonds (C), and molecular surface charge  
921 distribution (D). Fig. 6B was generated on the PDB sum website  
922 ([http://www.ebi.ac.uk/thornton-srv/databases/cgi-](http://www.ebi.ac.uk/thornton-srv/databases/cgi-bin/pdbsum/GetPage.pl?pdbcode=index.html)  
923 [bin/pdbsum/GetPage.pl?pdbcode=index.html](http://www.ebi.ac.uk/thornton-srv/databases/cgi-bin/pdbsum/GetPage.pl?pdbcode=index.html)). The molecular surface shown in Fig. 6D  
924 is colored red (negative), blue (positive), and white (hydrophobic).

925

**Table 1.** Statistics of the NMR structure calculation<sup>†</sup>.

|                                      |               |
|--------------------------------------|---------------|
| Total number of NOEs                 | 526           |
| short-range, $ i-j  \leq 1$          | 298           |
| medium-range, $1 <  i-j  < 5$        | 59            |
| long-range, $ i-j  \geq 5$           | 169           |
| Angle constraints (phi, psi)         | 24, 24        |
| Hydrogen bonds (pair)                | 8             |
| Disulfide bonds (pair)               | 3             |
| r. m. s. d. for residues 2 to 49 (Å) |               |
| average backbone RMSD to mean        | 0.15 +/- 0.06 |
| average heavy atom RMSD to mean      | 0.71 +/- 0.07 |
| Ramachandran plot (%)                |               |
| most favored region                  | 76.9          |
| additionally allowed region          | 15.4          |
| generously allowed region            | 7.7           |
| disallowed region                    | 0             |

<sup>†</sup> The NMR structure was calculated using CYANA version 2.1. No violation was observed in both distance and dihedral angle constraints.

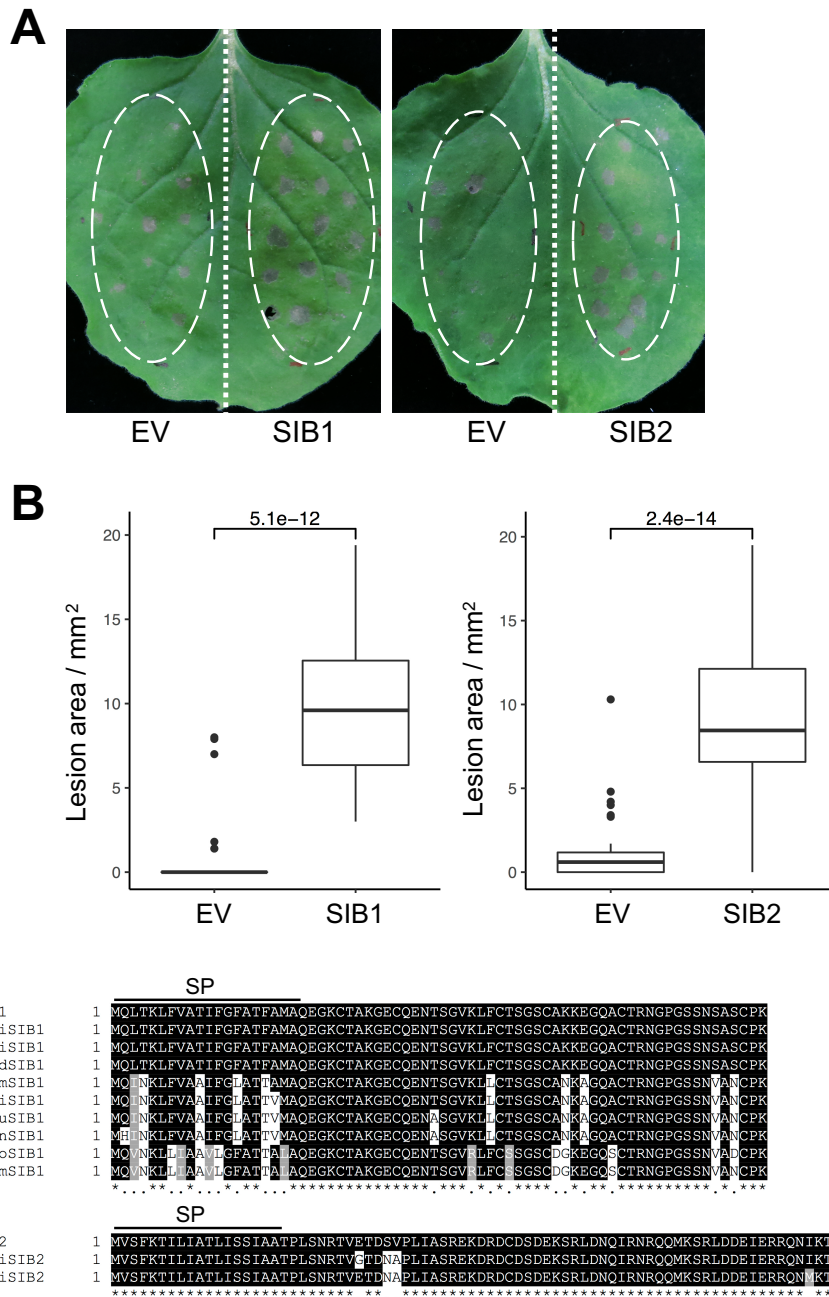

**Figure 1.** Decreased immunity to *C. orbiculare* caused by transient expression of the effector SIB1 or SIB2 in *N. benthamiana*. (A) Increased lesion development of *C. orbiculare* on *N. benthamiana* when SIB1 or SIB2 were transiently expressed. *N. benthamiana* leaves were infiltrated by *A. tumefaciens* harboring the plasmid expressing SIB1, the plasmid expressing SIB2, or the empty plasmid (EV), and the infiltrated leaves were incubated for 2 days and then drop-inoculated with conidial suspensions ( $5 \times 10^5$  conidia/mL) of *C. orbiculare* 104-T. The photograph was taken at 5 dpi. (B) Quantification of lesion size on *N. benthamiana* leaves transiently expressing SIB1 or SIB2 after *C. orbiculare* inoculation. The lesion size in Fig. 1A was measured using ImageJ software for three biological replicates. The *t* test was used to identify significant differences. (C) SIB1 and SIB2 are conserved in *Colletotrichum* species. The amino acid sequence alignment of SIB1 or SIB2 with their orthologs of *Colletotrichum* species were shown. The alignments include the orthologs showing more than 75% amino acid identity obtained using a BlastP search of the NCBI non-redundant protein database using SIB1 or SIB2 as the query sequences. They were derived from the diverse *Colletotrichum* species represented by Cspi (*C. spinosum*), Ctri (*C. trifolii*), Csid (*C. sidae*), Ccam (*C. camelliae*), Casi (*C. asianum*), Cfru (*C. fructicola*), Caen (*C. aenigma*), Csco (*C. scovillei*), and Cnym (*C. nymphaeae*). The alignments were made using the ClustalW program. Identical residues in SIB1 or SIB2 are shaded in black, and conserved residues are shaded in gray. SP indicates the putative signal peptide region.



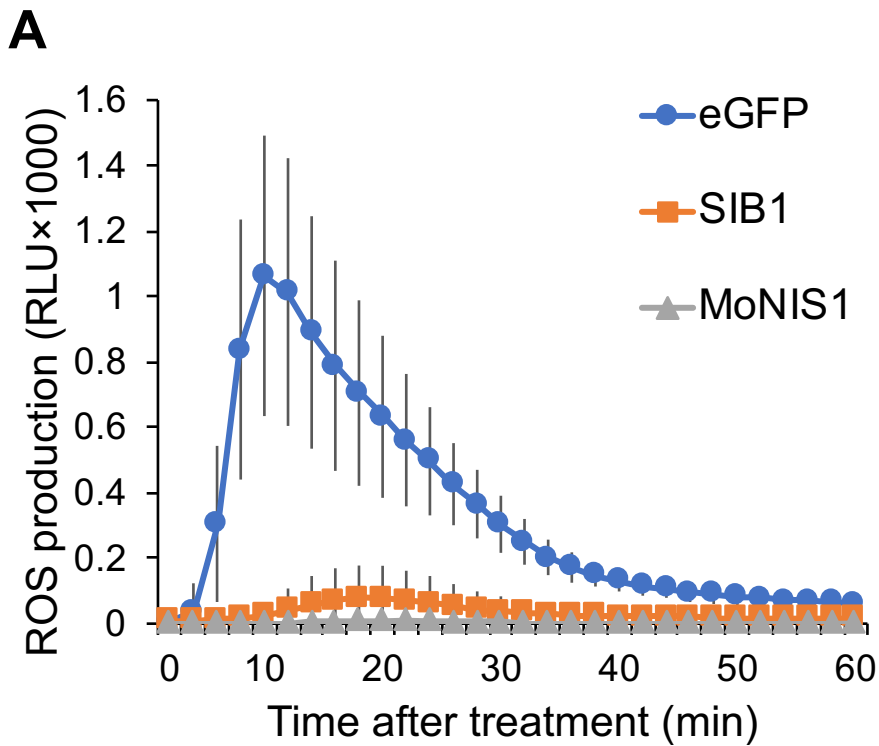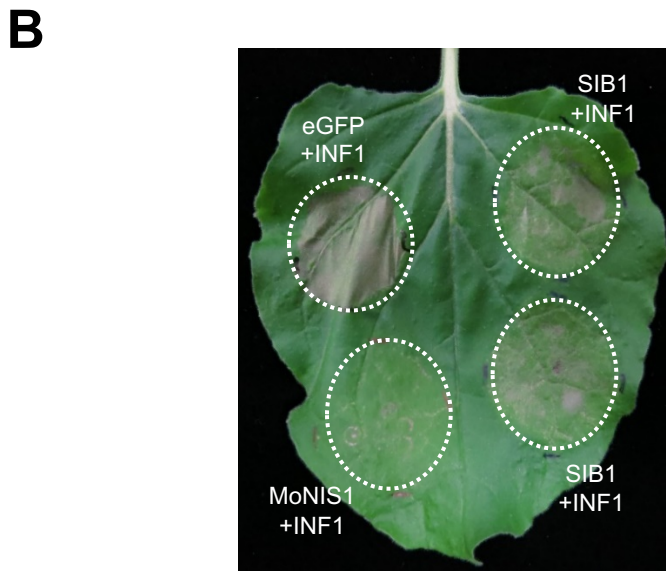

**Figure 2.** Suppression of *SIB1* by PAMP-triggered ROS generation and HR cell death in *N. benthamiana*. (A) flg22-triggered ROS production in *N. benthamiana* was inhibited by transient expression of *SIB1*. After treatment with 500 nM flg22, the total ROS production was measured in *N. benthamiana* transiently expressing *SIB1-HA*, or *MoNIS1-HA* (positive control), or *eGFP* (negative control). (B) Partial suppression of *INF1*-induced cell death by *SIB1*. *N. benthamiana* leaves were first infiltrated with *A. tumefaciens* harboring a plasmid expressing *SIB1*, *eGFP* (negative control), or *MoNIS1* (positive control). After 1 day, the second infiltration with *A. tumefaciens* harboring a plasmid expressing *INF1* was performed, and the infiltrated leaves were incubated for 5 days.

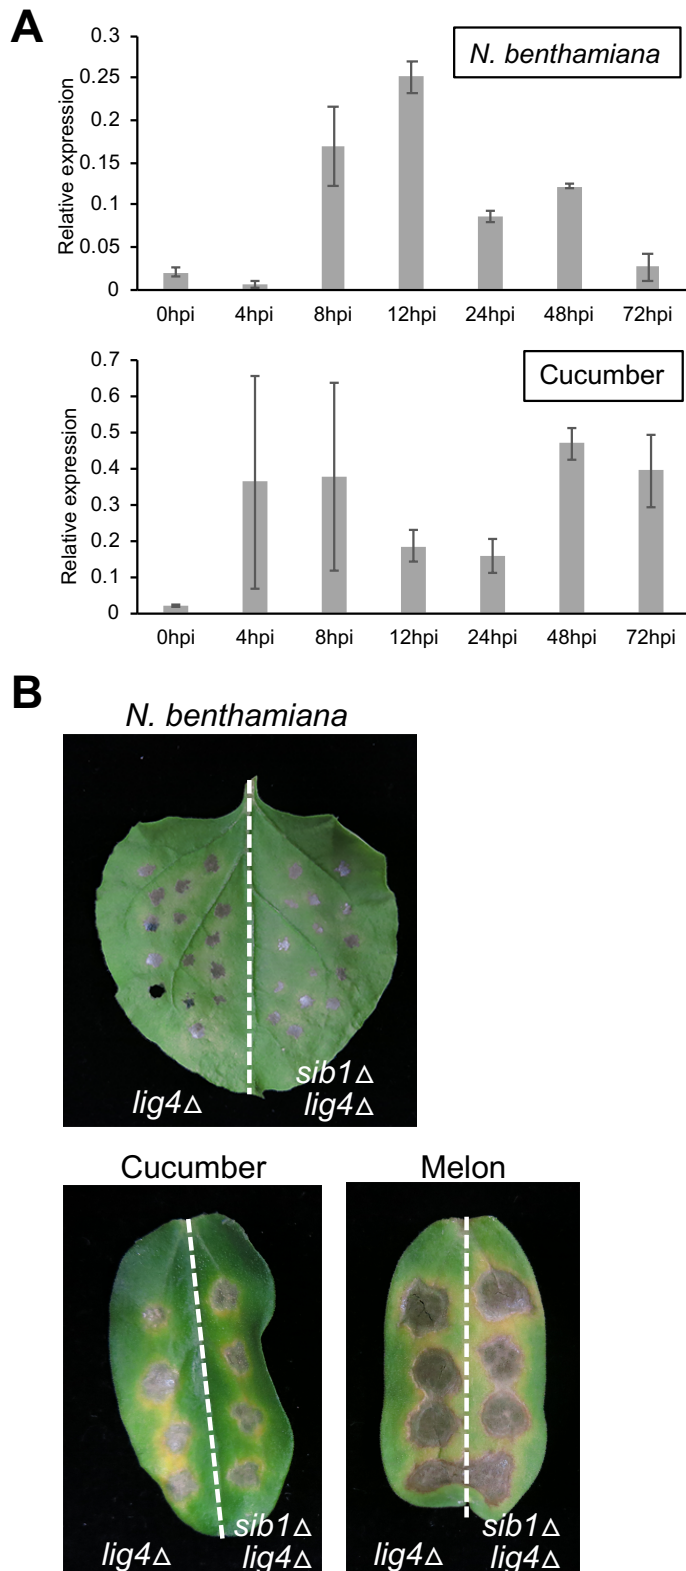

**Figure 3.** Gene expression and knockout analysis of *SIB1*. (A) Expression pattern of *SIB1* in *C. orbiculare* inoculated on *N. benthamiana* and cucumber. The conidial suspension of *C. orbiculare* wild-type strain ( $1 \times 10^6$  conidia per milliliter) was inoculated on *N. benthamiana* leaves or cucumber cotyledons. The total RNA of inoculated plants was extracted and subjected to RT-qPCR analysis to investigate *SIB1* expression. The *C. orbiculare* actin gene was used as the internal control. Mean and SD were calculated from three independent samples. (B) Gene disruption of *SIB1* had no visible effects on the virulence of *C. orbiculare* inoculated on *N. benthamiana*, cucumber, or melon. Conidial suspension ( $5 \times 10^5$  conidia/mL) of the parental *lig4* $\Delta$  strain or the *sib1* $\Delta$  strain (*lig4* $\Delta$  background) was drop-inoculated on *N. benthamiana* leaves, cucumber cotyledons, and melon cotyledons, and the inoculated plants were incubated at 24° C for 7 days.

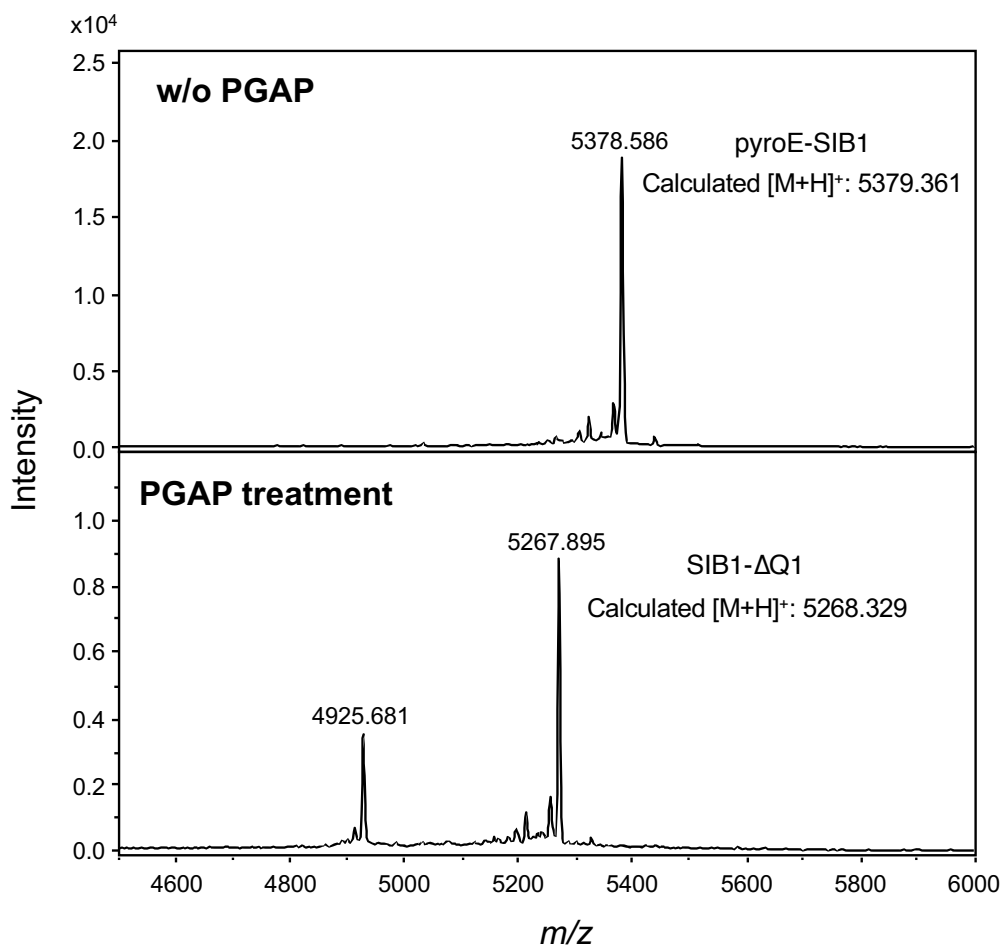

**Figure 4.** Confirmation of pyroglutamylation of SIB1. Pyroglutamate aminopeptidase (PGAP)-untreated (*upper panel*) and -treated (*lower panel*) SIB1 were analyzed using MALDI-TOF-MS.

**A**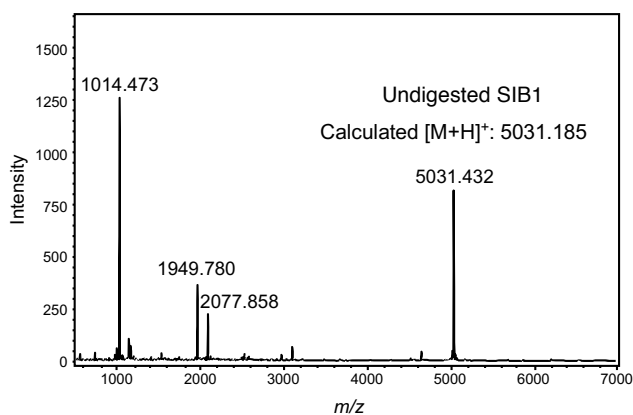**B**

| Position | SS linked peptide     | Monoisotopic mass ( $m/z$ ) |          |        |
|----------|-----------------------|-----------------------------|----------|--------|
|          |                       | Calculated                  | Observed | Error  |
| 20-29    | LFCTSGSCAK            | 1014.438                    | 1014.473 | +0.035 |
| 31-50    | EGQACTRNGPGSSNSASCPK  | 1948.824                    | 1949.780 | +0.956 |
| 20-29    | KEGQACTRNGPGSSNSASCPK | 2076.919                    | 2077.858 | +0.939 |

**Figure 5.** Determination of disulfide linkages of SIB1. (A) MALDI-TOF-MS spectra of SIB1 after Lys-C treatment. (B) The assignments of SS linked peptides of SIB1 obtained by Lys-C digestion.

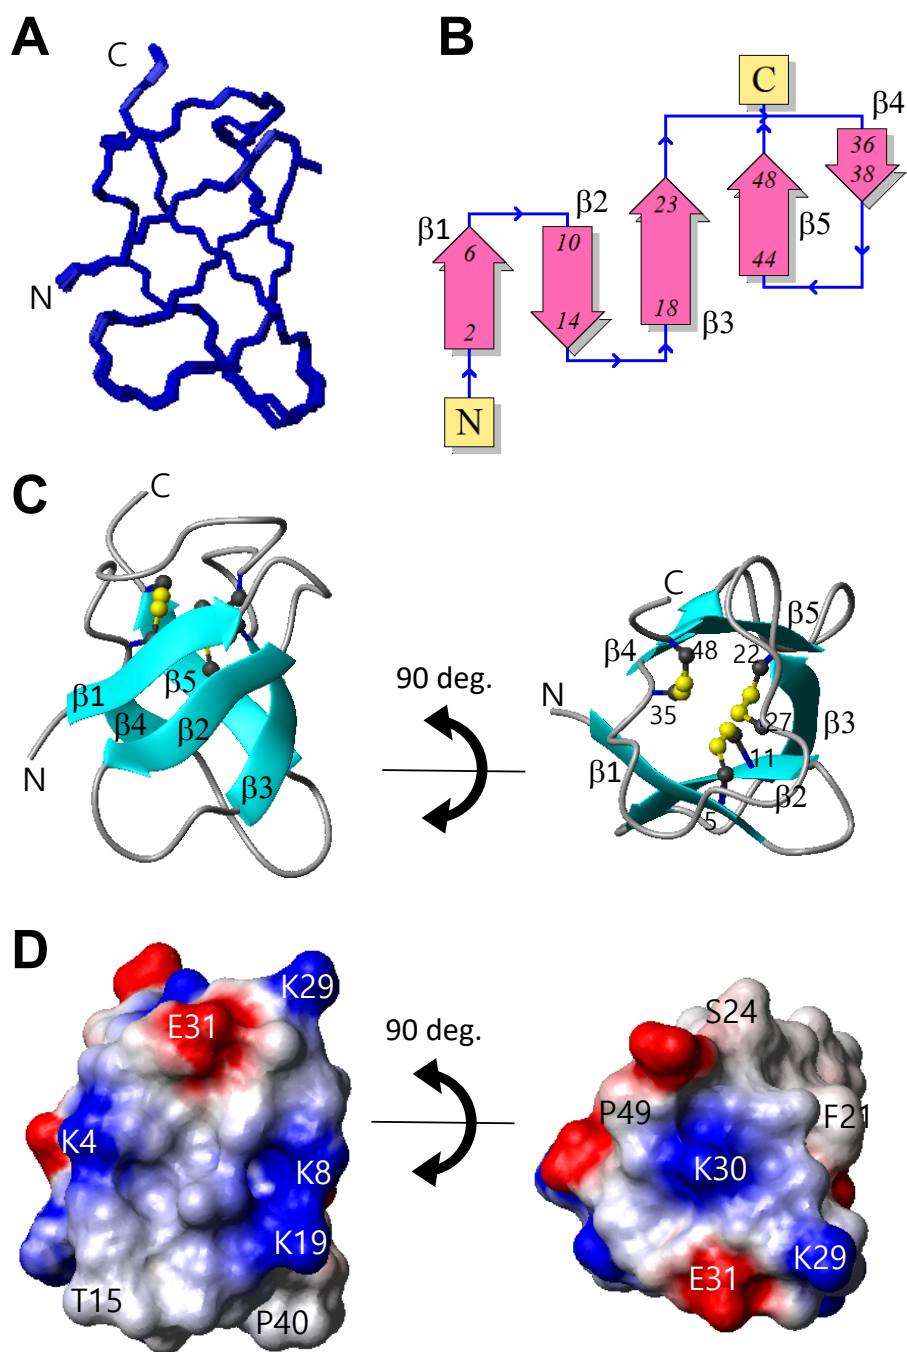

**Figure 6.** Three-dimensional structure of SIB1. Overlay of 20 NMR structures (A), topology of five  $\beta$ -strands (B), ribbon model of the representative structure using a ball-and-stick representation of the three disulfide bonds (C), and molecular surface charge distribution (D). Fig. 6B was generated on the PDB sum website (<http://www.ebi.ac.uk/thornton-srv/databases/cgi-bin/pdbsum/GetPage.pl?pdbcode=index.html>). The molecular surface shown in Fig. 6D is colored red (negative), blue (positive), and white (hydrophobic).
